# Supplementary material
Source: PubMed Central journal article supplement (PMC6657151)
Supplement: DalyTables_S1-S4_rev.pdf [file DalyTables_S1-S4_rev.pdf]

Table S1.

*Descriptive Statistics and Correlation Matrix for the Physiological Dysregulation Index and Individual Biomarker Variables at Baseline and Follow-Up.*

|                                  | M (SD)       | Phys<br>dys<br>(T1) | Phys<br>dys<br>(T2) | BP<br>(T1) | BP<br>(T2) | HR<br>(T1) | HR<br>(T2) | CRP<br>(T1) | CRP<br>(T2) | WB<br>(T1) | WB<br>(T2) | Trig<br>(T1) | Trig<br>(T2) | Chol<br>ratio<br>(T1) | Chol<br>ratio<br>(T2) | Gluc<br>(T1) | Gluc<br>(T2) | HbA<br>1c<br>(T1) |      |
|----------------------------------|--------------|---------------------|---------------------|------------|------------|------------|------------|-------------|-------------|------------|------------|--------------|--------------|-----------------------|-----------------------|--------------|--------------|-------------------|------|
| Physiological dysregulation (T1) | -.01 (0.98)  | 1.00                |                     |            |            |            |            |             |             |            |            |              |              |                       |                       |              |              |                   |      |
| Physiological dysregulation (T2) | .01 (1.02)   | 0.68                | 1.00                |            |            |            |            |             |             |            |            |              |              |                       |                       |              |              |                   |      |
| Blood pressure (T1)              | 103.6 (12.1) | 0.40                | 0.25                | 1.00       |            |            |            |             |             |            |            |              |              |                       |                       |              |              |                   |      |
| Blood pressure (T2)              | 103.1 (12.3) | 0.21                | 0.35                | 0.50       | 1.00       |            |            |             |             |            |            |              |              |                       |                       |              |              |                   |      |
| Heart rate (T1)                  | 67.2 (10.7)  | 0.46                | 0.27                | 0.09       | 0.07       | 1.00       |            |             |             |            |            |              |              |                       |                       |              |              |                   |      |
| Heart rate (T2)                  | 66.4 (10.6)  | 0.29                | 0.47                | 0.11       | 0.08       | 0.55       | 1.00       |             |             |            |            |              |              |                       |                       |              |              |                   |      |
| C-reactive protein (T1)          | 0.68 (1.11)  | 0.55                | 0.41                | 0.11       | 0.08       | 0.17       | 0.14       | 1.00        |             |            |            |              |              |                       |                       |              |              |                   |      |
| C-reactive protein (T2)          | 0.56 (1.10)  | 0.36                | 0.54                | 0.09       | 0.07       | 0.11       | 0.20       | 0.61        | 1.00        |            |            |              |              |                       |                       |              |              |                   |      |
| White blood cells (T1)           | 6.46 (1.93)  | 0.52                | 0.39                | 0.08       | 0.05       | 0.18       | 0.11       | 0.29        | 0.22        | 1.00       |            |              |              |                       |                       |              |              |                   |      |
| White blood cells (T2)           | 6.61 (2.02)  | 0.37                | 0.54                | 0.07       | 0.06       | 0.10       | 0.18       | 0.22        | 0.29        | 0.63       | 1.00       |              |              |                       |                       |              |              |                   |      |
| Triglyceride level (T1)          | 1.79 (1.06)  | 0.62                | 0.41                | 0.10       | 0.06       | 0.13       | 0.07       | 0.15        | 0.11        | 0.19       | 0.15       | 1.00         |              |                       |                       |              |              |                   |      |
| Triglyceride level (T2)          | 1.52 (0.84)  | 0.44                | 0.59                | 0.08       | 0.07       | 0.05       | 0.12       | 0.17        | 0.13        | 0.15       | 0.19       | 0.61         | 1.00         |                       |                       |              |              |                   |      |
| Cholesterol ratio (T1)           | 3.80 (1.02)  | 0.54                | 0.38                | 0.07       | 0.07       | 0.04       | 0.02       | 0.20        | 0.12        | 0.14       | 0.11       | 0.56         | 0.40         | 1.00                  |                       |              |              |                   |      |
| Cholesterol ratio (T2)           | 3.53 (1.09)  | 0.38                | 0.51                | 0.03       | 0.06       | 0.03       | 0.05       | 0.16        | 0.17        | 0.12       | 0.10       | 0.42         | 0.61         | 0.72                  | 1.00                  |              |              |                   |      |
| Glucose (T1)                     | 4.93 (1.03)  | 0.49                | 0.23                | 0.08       | 0.04       | 0.07       | 0.05       | 0.10        | 0.05        | -0.02      | 0.04       | 0.09         | 0.10         | 0.03                  | -0.01                 | 1.00         |              |                   |      |
| Glucose (T2)                     | 5.43 (1.03)  | 0.28                | 0.55                | 0.07       | 0.01       | 0.04       | 0.09       | 0.10        | 0.11        | 0.10       | 0.08       | 0.09         | 0.13         | 0.04                  | 0.03                  | 0.47         | 1.00         |                   |      |
| HbA1c (T1)                       | 40.83 (7.2)  | 0.50                | 0.41                | 0.04       | -0.04      | 0.12       | 0.11       | 0.15        | 0.10        | 0.16       | 0.16       | 0.18         | 0.16         | 0.05                  | 0.02                  | 0.57         | 0.46         | 1.00              |      |
| HbA1c (T2)                       | 41.6 (8.23)  | 0.41                | 0.52                | 0.03       | -0.03      | 0.12       | 0.13       | 0.14        | 0.15        | 0.14       | 0.18       | 0.17         | 0.20         | 0.04                  | 0.04                  | 0.43         | 0.57         | 0.79              | 1.00 |

Note

: Correlations greater than 0.05 are statistically significant at the  $p < .01$  level.

Physiological dysregulation measures are derived from eight standardized biomarkers and the measures are standardized to have a mean of 0 and SD of one across waves. Blood pressure (BP) is derived from the mean of systolic and diastolic blood pressure (mmHg). Heart rate (HR) is measured in beats per minute. C-reactive protein (CRP) is the natural logarithm of CRP measured in mg/L. White blood cell count (WB) is measured in  $10^9$  cells/L. Triglyceride level (Trig) is measured in mmol/L. The cholesterol ratio is the ratio of total to HDL cholesterol (both measured in mmol/L). Glucose (Gluc) is measured in mmol/L and glycated haemoglobin (HbA1c) is measured in mmol/mol.

Table S2.

*Diagnoses of Chronic Conditions and Medication Usage for ELSA Participants.*

|                                              | Full sample<br>(N = 3,609) | Obese<br>(N = 1,122) | Non-obese<br>(N = 2,487) |
|----------------------------------------------|----------------------------|----------------------|--------------------------|
| Variable                                     | %                          | %                    | %                        |
| High blood pressure                          | 39.4                       | 51.6                 | 33.9                     |
| Angina                                       | 8.4                        | 11.2                 | 7.1                      |
| Congestive heart failure                     | 0.6                        | 1.5                  | 0.2                      |
| Myocardial infarction                        | 4.9                        | 6.1                  | 4.3                      |
| Arrhythmia                                   | 7.0                        | 7.6                  | 6.7                      |
| Heart murmur                                 | 3.9                        | 4.3                  | 3.7                      |
| Stroke                                       | 3.2                        | 3.8                  | 2.9                      |
| Diabetes or high blood sugar                 | 8.8                        | 15.1                 | 6.0                      |
| High cholesterol                             | 35.0                       | 39.7                 | 32.8                     |
| Lung disease                                 | 5.9                        | 5.9                  | 5.9                      |
| Asthma                                       | 13.2                       | 16.4                 | 11.7                     |
| Arthritis                                    | 36.6                       | 46.4                 | 32.1                     |
| Osteoporosis                                 | 7.7                        | 8.4                  | 7.4                      |
| Cancer                                       | 7.6                        | 7.8                  | 7.5                      |
| Psychiatric condition                        | 10.3                       | 11.2                 | 9.9                      |
| Glaucoma                                     | 5.9                        | 5.4                  | 6.1                      |
| Diabetic retinopathy                         | 1.7                        | 3.3                  | 1.0                      |
| Macular degeneration                         | 3.3                        | 3.0                  | 3.5                      |
| Cataracts                                    | 18.5                       | 19.5                 | 18.1                     |
| Blood pressure medication                    | 29.0                       | 38.8                 | 24.6                     |
| Injecting insulin                            | 1.7                        | 3.0                  | 1.1                      |
| Diabetes medication                          | 5.8                        | 10.4                 | 3.7                      |
| Cholesterol lowering medication              | 20.6                       | 26.5                 | 18.0                     |
| Cholesterol medication<br>(prophylactic use) | 1.6                        | 2.0                  | 1.5                      |

Table S3.

*Correlation Matrix for Obesity, Weight Discrimination, the Physiological Dysregulation Index, and Covariates.*

|                           | 1     | 2     | 3     | 4     | 5     | 6     | 7     | 8     | 9     | 10   | 11    | 12    | 13    | 14   | 15    | 16   | 17    | 18    |
|---------------------------|-------|-------|-------|-------|-------|-------|-------|-------|-------|------|-------|-------|-------|------|-------|------|-------|-------|
| 1. Obesity                | 1.00  |       |       |       |       |       |       |       |       |      |       |       |       |      |       |      |       |       |
| 2. Weight discrimination  | 0.27  | 1.00  |       |       |       |       |       |       |       |      |       |       |       |      |       |      |       |       |
| 3. Physiol. dysreg. (T1)  | 0.33  | 0.15  | 1.00  |       |       |       |       |       |       |      |       |       |       |      |       |      |       |       |
| 4. Physiol. dysreg. (T2)  | 0.27  | 0.16  | 0.68  | 1.00  |       |       |       |       |       |      |       |       |       |      |       |      |       |       |
| 5. Age                    | -0.04 | -0.11 | 0.03  | 0.04  | 1.00  |       |       |       |       |      |       |       |       |      |       |      |       |       |
| 6. Female                 | 0.06  | 0.02  | -0.08 | -0.07 | 0.06  | 1.00  |       |       |       |      |       |       |       |      |       |      |       |       |
| 7. White                  | 0.00  | -0.06 | -0.09 | -0.02 | 0.02  | 0.07  | 1.00  |       |       |      |       |       |       |      |       |      |       |       |
| 8. Degree                 | -0.07 | 0.00  | -0.09 | -0.09 | -0.14 | -0.13 | -0.04 | 1.00  |       |      |       |       |       |      |       |      |       |       |
| 9. Wealth                 | -0.15 | -0.09 | -0.19 | -0.20 | -0.11 | -0.05 | 0.02  | 0.25  | 1.00  |      |       |       |       |      |       |      |       |       |
| 10. High blood pressure   | 0.17  | 0.06  | 0.16  | 0.16  | 0.22  | -0.02 | -0.01 | -0.07 | -0.13 | 1.00 |       |       |       |      |       |      |       |       |
| 11. Angina                | 0.07  | 0.04  | 0.03  | 0.05  | 0.23  | -0.05 | 0.01  | -0.05 | -0.13 | 0.18 | 1.00  |       |       |      |       |      |       |       |
| 12. Heart failure         | 0.08  | 0.02  | 0.16  | 0.08  | 0.00  | -0.01 | -0.09 | 0.02  | -0.03 | 0.05 | 0.13  | 1.00  |       |      |       |      |       |       |
| 13. Myocardial infarc.    | 0.04  | 0.00  | -0.01 | 0.03  | 0.18  | -0.05 | 0.03  | -0.05 | -0.09 | 0.14 | 0.40  | 0.11  | 1.00  |      |       |      |       |       |
| 14. Arrhythmia            | 0.02  | -0.02 | -0.01 | 0.00  | 0.13  | 0.02  | 0.03  | 0.02  | -0.03 | 0.09 | 0.11  | 0.09  | 0.11  | 1.00 |       |      |       |       |
| 15. Heart murmur          | 0.02  | 0.00  | -0.01 | -0.01 | 0.12  | 0.07  | 0.03  | -0.01 | -0.04 | 0.11 | 0.11  | 0.06  | 0.14  | 0.15 | 1.00  |      |       |       |
| 16. Diabetes              | 0.15  | 0.08  | 0.24  | 0.27  | 0.09  | -0.05 | -0.03 | 0.00  | -0.11 | 0.22 | 0.16  | 0.11  | 0.16  | 0.03 | 0.04  | 1.00 |       |       |
| 17. Stroke                | 0.02  | 0.01  | 0.01  | 0.02  | 0.15  | 0.02  | 0.04  | -0.04 | -0.10 | 0.13 | 0.11  | 0.00  | 0.11  | 0.09 | 0.11  | 0.06 | 1.00  |       |
| 18 High cholesterol       | 0.07  | 0.04  | 0.06  | 0.08  | 0.13  | 0.05  | 0.04  | -0.08 | -0.05 | 0.26 | 0.16  | 0.00  | 0.09  | 0.05 | 0.06  | 0.13 | 0.13  | 1.00  |
| 19. Lung disease          | 0.00  | 0.05  | 0.04  | 0.07  | 0.06  | -0.02 | 0.01  | -0.04 | -0.12 | 0.06 | 0.10  | 0.02  | 0.06  | 0.03 | 0.06  | 0.02 | 0.02  | 0.06  |
| 20. Asthma                | 0.07  | 0.05  | 0.07  | 0.06  | 0.01  | 0.06  | 0.01  | 0.01  | -0.07 | 0.02 | -0.01 | -0.02 | -0.03 | 0.05 | 0.03  | 0.00 | 0.05  | 0.04  |
| 21. Arthritis             | 0.14  | 0.06  | 0.07  | 0.08  | 0.18  | 0.18  | 0.01  | -0.09 | -0.16 | 0.17 | 0.14  | 0.07  | 0.06  | 0.11 | 0.11  | 0.06 | 0.09  | 0.15  |
| 22. Osteoporosis          | 0.02  | 0.00  | 0.05  | 0.06  | 0.14  | 0.18  | -0.03 | -0.06 | -0.07 | 0.05 | 0.11  | 0.09  | 0.10  | 0.06 | 0.09  | 0.00 | 0.06  | 0.06  |
| 23. Cancer                | 0.01  | 0.03  | 0.02  | 0.03  | 0.11  | 0.06  | -0.02 | -0.02 | 0.00  | 0.04 | 0.03  | 0.07  | 0.02  | 0.04 | 0.03  | 0.02 | 0.00  | 0.02  |
| 24. Psychiatric condition | 0.02  | 0.06  | 0.03  | 0.04  | -0.12 | 0.07  | 0.06  | 0.05  | -0.06 | 0.03 | 0.02  | 0.02  | -0.01 | 0.01 | -0.01 | 0.00 | -0.01 | 0.05  |
| 25. Glaucoma              | -0.01 | -0.01 | 0.00  | 0.01  | 0.16  | -0.01 | 0.01  | -0.03 | -0.04 | 0.08 | 0.05  | 0.07  | 0.07  | 0.05 | 0.05  | 0.02 | -0.01 | 0.06  |
| 26. Diabetic retinopathy  | 0.08  | 0.06  | 0.12  | 0.10  | 0.06  | 0.00  | -0.01 | 0.00  | -0.05 | 0.12 | 0.08  | -0.01 | 0.08  | 0.07 | 0.03  | 0.36 | 0.11  | 0.09  |
| 27. Macular degen.        | -0.01 | -0.03 | -0.03 | 0.00  | 0.19  | 0.01  | 0.04  | 0.00  | -0.01 | 0.05 | 0.06  | -0.02 | 0.02  | 0.04 | 0.05  | 0.02 | 0.02  | -0.01 |
| 28. Cataracts             | 0.02  | -0.03 | 0.04  | 0.04  | 0.48  | 0.09  | 0.00  | -0.06 | -0.05 | 0.15 | 0.17  | 0.02  | 0.14  | 0.08 | 0.07  | 0.09 | 0.12  | 0.10  |

|                                   |      |       |      |      |      |       |       |       |       |      |      |       |      |      |       |      |       |      |
|-----------------------------------|------|-------|------|------|------|-------|-------|-------|-------|------|------|-------|------|------|-------|------|-------|------|
| 29. Blood pressure med.           | 0.15 | 0.07  | 0.13 | 0.13 | 0.25 | -0.04 | -0.04 | -0.07 | -0.13 | 0.77 | 0.19 | 0.06  | 0.10 | 0.08 | 0.08  | 0.22 | 0.14  | 0.24 |
| 30. Injecting insulin             | 0.07 | 0.06  | 0.20 | 0.13 | 0.04 | -0.01 | -0.08 | 0.00  | -0.04 | 0.10 | 0.13 | 0.15  | 0.08 | 0.05 | 0.00  | 0.39 | 0.11  | 0.06 |
| 31. Diabetes medication           | 0.14 | 0.09  | 0.24 | 0.24 | 0.05 | -0.05 | -0.05 | 0.00  | -0.09 | 0.15 | 0.09 | 0.11  | 0.07 | 0.01 | -0.01 | 0.77 | 0.07  | 0.11 |
| 32. Cholesterol med. <sup>a</sup> | 0.10 | 0.04  | 0.06 | 0.08 | 0.14 | 0.03  | 0.01  | -0.08 | -0.09 | 0.26 | 0.20 | 0.01  | 0.11 | 0.04 | 0.07  | 0.18 | 0.15  | 0.68 |
| 33. Cholesterol med. <sup>b</sup> | 0.02 | -0.01 | 0.02 | 0.05 | 0.05 | -0.02 | 0.01  | 0.00  | -0.03 | 0.05 | 0.07 | -0.01 | 0.06 | 0.02 | 0.04  | 0.11 | -0.01 | 0.17 |
| 34. Depressive symp.              | 0.08 | 0.16  | 0.11 | 0.14 | 0.03 | 0.19  | 0.01  | -0.11 | -0.27 | 0.09 | 0.09 | 0.04  | 0.09 | 0.06 | 0.05  | 0.08 | 0.04  | 0.11 |

<sup>a</sup> Cholesterol lowering medication.

<sup>b</sup> Cholesterol medication (prophylactic use)

Table S3 (continued).

*Correlation Matrix for Obesity, Weight Discrimination, Physiological Dysregulation Index, and Covariates.*

|                                   | 19    | 20    | 21   | 22   | 23    | 24    | 25    | 26   | 27    | 28   | 29   | 30   | 31   | 32    | 33   |
|-----------------------------------|-------|-------|------|------|-------|-------|-------|------|-------|------|------|------|------|-------|------|
| 19. Lung disease                  | 1.00  |       |      |      |       |       |       |      |       |      |      |      |      |       |      |
| 20. Asthma                        | 0.14  | 1.00  |      |      |       |       |       |      |       |      |      |      |      |       |      |
| 21. Arthritis                     | 0.08  | 0.07  | 1.00 |      |       |       |       |      |       |      |      |      |      |       |      |
| 22. Osteoporosis                  | 0.10  | 0.09  | 0.16 | 1.00 |       |       |       |      |       |      |      |      |      |       |      |
| 23. Cancer                        | 0.06  | 0.04  | 0.03 | 0.11 | 1.00  |       |       |      |       |      |      |      |      |       |      |
| 24. Psychiatric condition         | 0.05  | 0.09  | 0.07 | 0.04 | -0.01 | 1.00  |       |      |       |      |      |      |      |       |      |
| 25. Glaucoma                      | 0.08  | -0.02 | 0.08 | 0.06 | 0.05  | -0.02 | 1.00  |      |       |      |      |      |      |       |      |
| 26. Diabetic retinopathy          | 0.00  | -0.01 | 0.05 | 0.00 | 0.01  | -0.01 | 0.08  | 1.00 |       |      |      |      |      |       |      |
| 27. Macular degen.                | -0.02 | 0.01  | 0.06 | 0.00 | 0.06  | -0.03 | 0.06  | 0.06 | 1.00  |      |      |      |      |       |      |
| 28. Cataracts                     | 0.06  | 0.03  | 0.14 | 0.13 | 0.05  | -0.06 | 0.19  | 0.06 | 0.16  | 1.00 |      |      |      |       |      |
| 29. Blood pressure med.           | 0.03  | 0.01  | 0.14 | 0.01 | 0.04  | -0.01 | 0.07  | 0.12 | 0.05  | 0.15 | 1.00 |      |      |       |      |
| 30. Injecting insulin             | -0.01 | -0.01 | 0.00 | 0.03 | 0.04  | -0.02 | 0.02  | 0.47 | -0.01 | 0.06 | 0.10 | 1.00 |      |       |      |
| 31. Diabetes medication           | 0.01  | 0.01  | 0.03 | 0.00 | 0.01  | -0.01 | -0.03 | 0.35 | -0.02 | 0.06 | 0.18 | 0.41 | 1.00 |       |      |
| 32. Cholesterol med. <sup>a</sup> | 0.05  | 0.04  | 0.14 | 0.06 | 0.02  | 0.02  | 0.04  | 0.13 | 0.01  | 0.10 | 0.30 | 0.10 | 0.18 | 1.00  |      |
| 33. Cholesterol med. <sup>b</sup> | 0.01  | 0.04  | 0.05 | 0.01 | 0.01  | -0.01 | 0.00  | 0.01 | -0.02 | 0.01 | 0.04 | 0.03 | 0.08 | -0.07 | 1.00 |
| 34. Depressive symp.              | 0.14  | 0.07  | 0.19 | 0.11 | 0.06  | 0.20  | 0.05  | 0.04 | 0.00  | 0.08 | 0.09 | 0.04 | 0.05 | 0.10  | 0.02 |

<sup>a</sup> Cholesterol lowering medication.

<sup>b</sup> Cholesterol medication (prophylactic use)

Table S4.

*Association between Perceived Weight Discrimination and Longitudinal Changes in Individual Biomarker Outcomes.*

|                                | <i>d</i> | 95% CI        |
|--------------------------------|----------|---------------|
|                                |          | Lower ; Upper |
| Blood pressure                 | .13      | [-.04 ; .30]  |
| Heart rate                     | .07      | [-.12 ; .25]  |
| C-reactive protein             | .16      | [.00 ; .32]   |
| White blood cell count         | .04      | [-.12 ; .20]  |
| Triglycerides                  | .20      | [.01 ; .39]   |
| Total cholesterol to HDL ratio | .10      | [-.10 ; .29]  |
| Glucose                        | .07      | [-.20; .33]   |
| Glycated hemoglobin            | .15      | [-.15; .45]   |

*Note.* 95% confidence intervals are based on models using robust standard errors.

Associations are not statistically significant after correction for multiple comparisons.

Models use latent change in biomarker z-scores as outcome variables. Models are adjusted for baseline biomarker levels, age, sex, ethnicity (white vs. other), degree qualification, household wealth, medication usage, chronic conditions, and depressive symptoms.
